# Supplementary material for: Multi-walled carbon nanotubes induced a controllable TiO2morphology transformation for high-rate and long-life lithium-ion batteries
Source: Royal Society of Chemistry journal article supplement (doi:10.1039/c7ra02190a), 2017-01-01
Supplement: c7ra02190a1.pdf [file c7ra02190a1.pdf]

## **Multi-Walled Carbon Nanotubes Induced Controllable TiO<sub>2</sub> Morphology Transformation for High-Rate and Long-Life Lithium-Ion Batteries**

Yu Xia,<sup>a</sup> Wan-Sheng Xiong,<sup>a</sup> Yun Jiang,<sup>a</sup> Weiwei Sun,<sup>b</sup> Hong-Qian Sang,<sup>a</sup> Rong-Xiang He,<sup>a</sup> Qidong Tai,<sup>a</sup> Bolei Chen,<sup>a</sup> Yumin Liu,<sup>\*a</sup> and Xing-Zhong Zhao<sup>c</sup>

<sup>a</sup> *Institute for Interdisciplinary Research, Key Laboratory of Optoelectronic Chemical Materials and Devices, Ministry of Education, Jiangnan University, Wuhan 430056, China. E-mail: ymliu@jhun.edu.cn.*

<sup>b</sup> *College of Aerospace Science and Engineering, National University of Defence Technology, Changsha, Hunan, 410073, China.*

<sup>c</sup> *School of Physics and Technology, Key Laboratory of Artificial Micro/Nano Structures, Ministry of Education, Wuhan University, Wuhan 430072, China.*

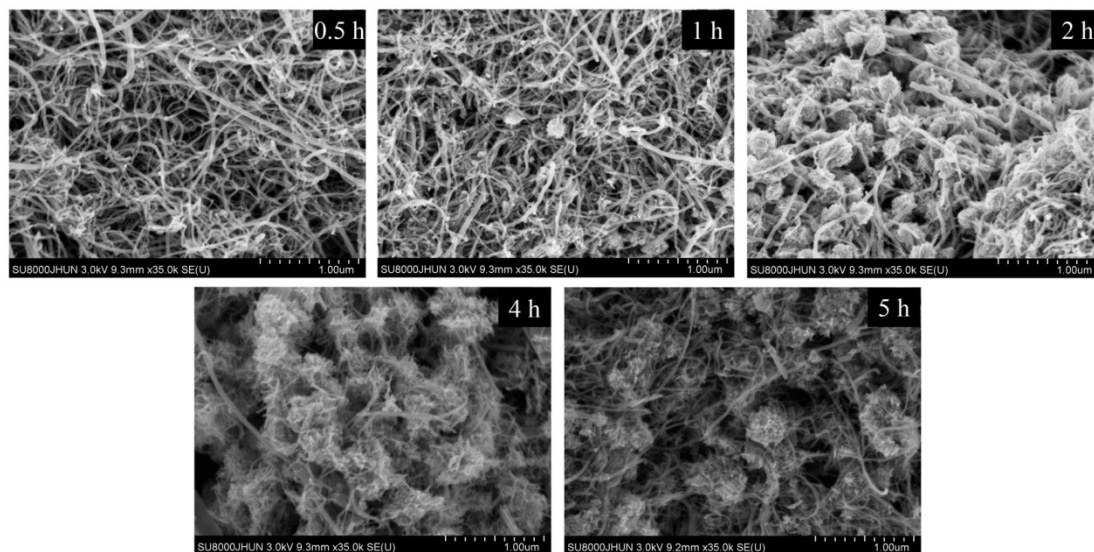

**Fig. S1** FE-SEM images of TNP@CNT HNs-1 obtained at different reaction time: 0.5 h, 1 h, 2 h, 4 h, and 5 h.

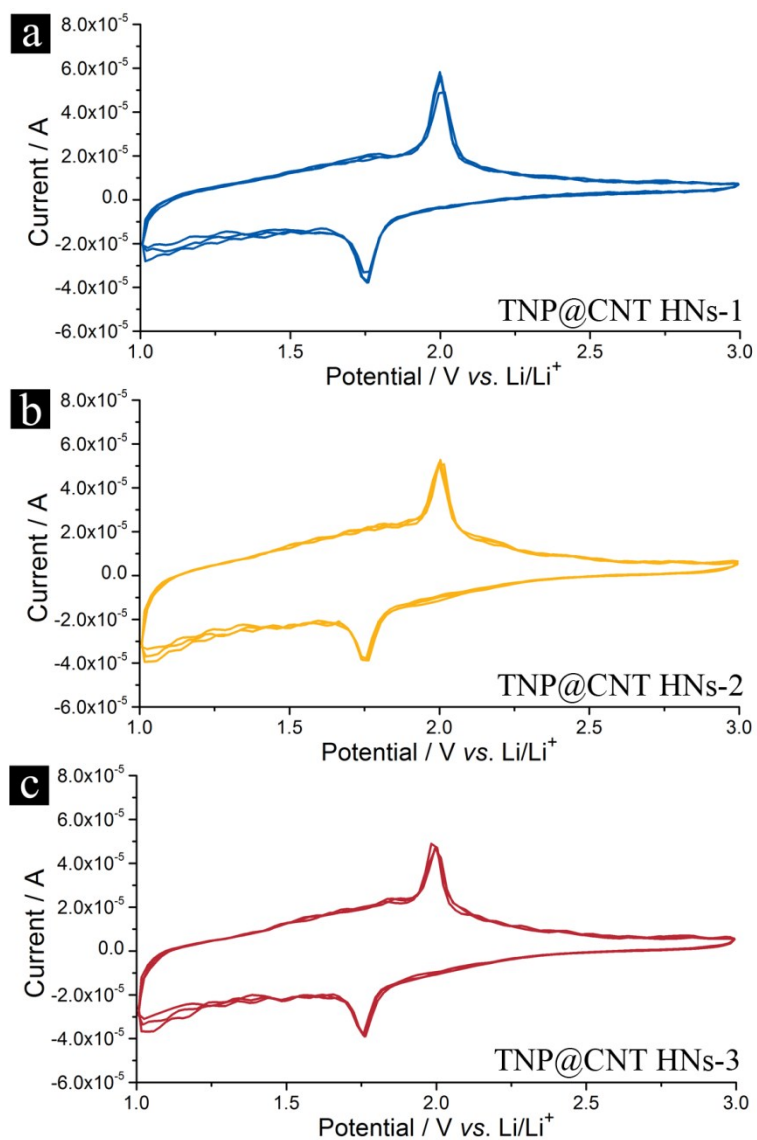

**Fig. S2** Cyclic voltammograms of (a) TNP@CNT HNs-1, (b) TNP@CNT HNs-2, and (c) TNP@CNT HNs-3, for the first three cycles between 1.0 and 3.0 V at a scan rate of  $0.1 \text{ mV s}^{-1}$ .

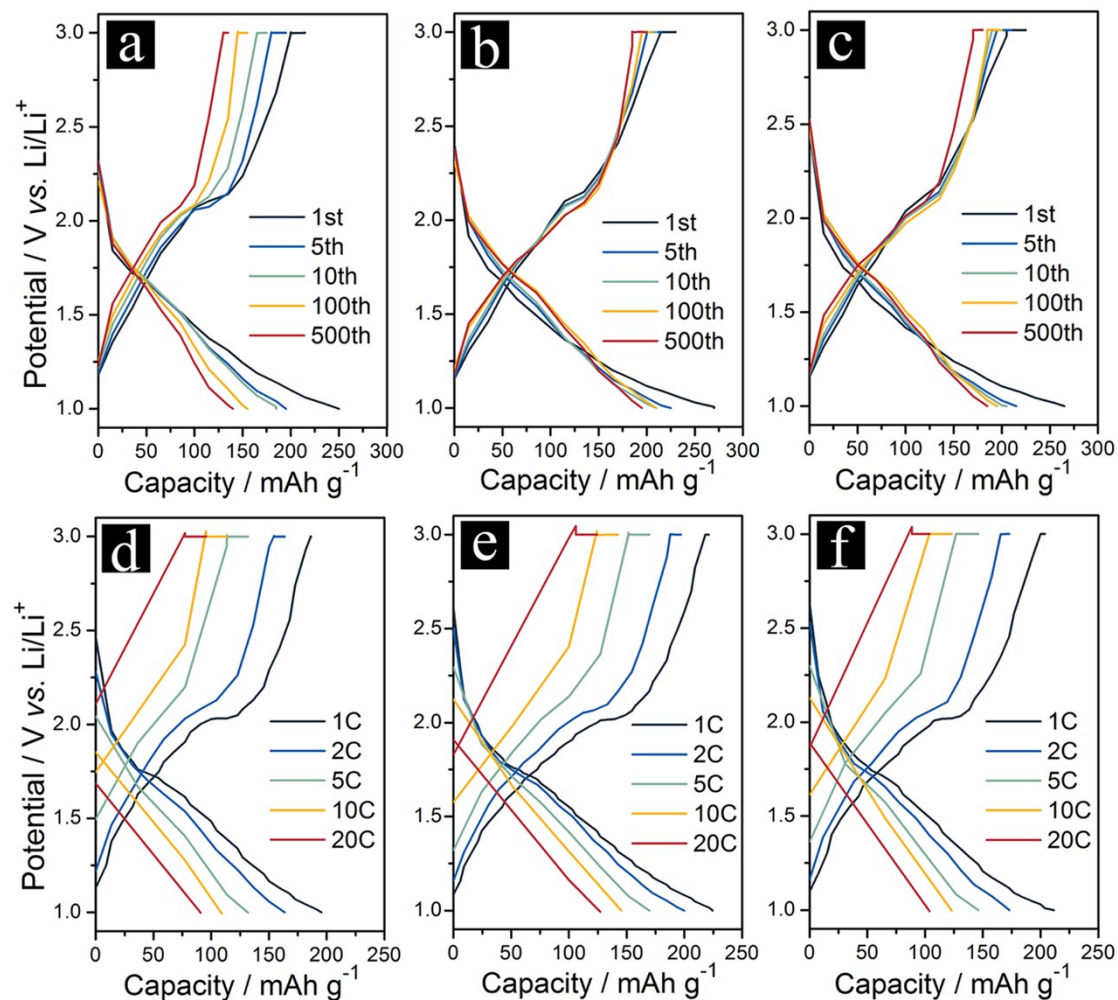

**Fig. S3** The charge-discharge galvanostatic curves for (a) TNP@CNT HNs-1, (b) TNP@CNT HNs-2, and (c) TNP@CNT HNs-3 cycled at a current rate of 2 C (340 mA g<sup>-1</sup>) in the voltage range from 1.0 to 3.0 V. The rate capability for the batteries based on (d) TNP@CNT HNs-1, (e) TNP@CNT HNs-2, and (f) TNP@CNT HNs-3 with increasing rates from 1 C (170 mA g<sup>-1</sup>) to 20 C (3.4 A g<sup>-1</sup>).

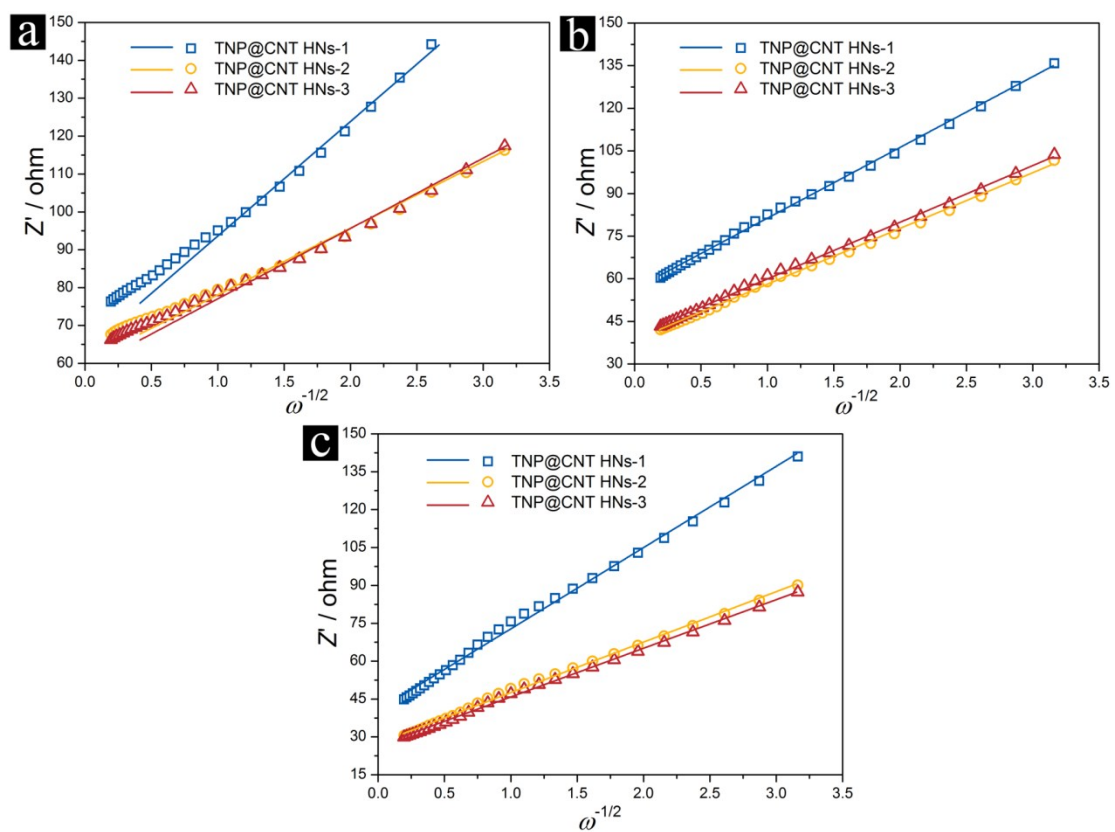

**Fig. S4** The linear fitting of  $Z'$  vs.  $\omega^{-1/2}$  plots for different TNP@CNT HNs anodes: (a) before initial cycle, (b) after 100 cycles and (c) after 500 cycles at 2 C rate ( $340 \text{ mA g}^{-1}$ ) between 1.0 and 3.0 V.

**Table S1** The calculated lithium diffusion coefficients of TNP@CNT HNs-1, TNP@CNT HNs-2, and TNP@CNT HNs-3.

| Samples       | $D_{\text{Li}}$ ( $\text{cm}^2 \text{s}^{-1}$ )<br>Before 1 <sup>st</sup> cycle | $D_{\text{Li}}$ ( $\text{cm}^2 \text{s}^{-1}$ )<br>after 100 cycles | $D_{\text{Li}}$ ( $\text{cm}^2 \text{s}^{-1}$ )<br>after 500 cycles |
|---------------|---------------------------------------------------------------------------------|---------------------------------------------------------------------|---------------------------------------------------------------------|
| TNP@CNT HNs-1 | $2.361 \times 10^{-6}$                                                          | $1.227 \times 10^{-6}$                                              | $1.432 \times 10^{-6}$                                              |
| TNP@CNT HNs-2 | $7.982 \times 10^{-6}$                                                          | $1.753 \times 10^{-6}$                                              | $2.967 \times 10^{-6}$                                              |
| TNP@CNT HNs-3 | $8.867 \times 10^{-6}$                                                          | $4.438 \times 10^{-6}$                                              | $6.329 \times 10^{-6}$                                              |
